# Supplementary material for: Intraoperative Driving Pressure and Postoperative Pulmonary Complications After Abdominal Surgery – A Posthoc Propensity Score–Weighted Cohort Analysis of the&nbsp;LAS VEGAS Study Comparing Open to Closed Surgery
Source: Research Square preprint supplement (doi:10.21203/rs.3.rs-107895/v1), 2020-11-24
Supplement: Supplementary file 1 [file c761bd51994d10e9d6ac8d3f.docx]

SUPPLEMENTARY DIGITAL CONTENT

**Associations between Driving Pressure and Postoperative Pulmonary Complications in Patients Undergoing Abdominal Surgery – a posthoc analysis of LAS VEGAS, focusing on differences between open and closed surgery**

Guido Mazzinari1,2, Ary Serpa Neto3,4,5, Sabrine NT. Hemmes5, Jaume Canet6, Goran Hedenstierna7, Samir Jaber8, Michael Hiesmayr9, Markus W. Hollmann5, Gary H. Mills10, Marcos F. Vidal Melo11, Rupert M. Pearse12, Christian Putensen13, Werner Schmid9, Paolo Severgnini14, Hermann Wrigge15, Oscar Diaz–Cambronero1,2, Lorenzo Ball16,17, Marcelo Gama de Abreu18, Paolo Pelosi16,17 and Marcus J. Schultz5,19,20 for the LAS VEGAS*–investigators*, the PROtective VEntilation NETwork, and the Clinical Trial Network of the European Society of Anaesthesiology

* Local Assessment of VEntilatory management during General Anesthesia for Surgery Study

**Hospital Universitario y Politécnico la Fe, Valencia, Spain**

1Research Group in Perioperative Medicine; 2Department of Anaesthesiology;

**Hospital Israelita Albert Einstein, São Paulo, Brazil**

3Department of Critical Care Medicine

**Instituto do Coração, Hospital das Clinicas HCFMUSP, Faculdade de Medicina, Universidade de Sao Paulo, Sao Paulo, Brazil**

4Cardio-Pulmonary Department, Pulmonary Division

**Academic Medical Center, Amsterdam, The Netherlands**

5Department of Intensive Care & Laboratory of Experimental Intensive Care and Anesthesiology (L·E·I·C·A)

**Hospital Universitari Germans Trias I Pujol, Barcelona, Spain**

6Department of Anesthesiology and Postoperative Care

**Uppsala University, Sweden**

7Department of Medical Sciences, Clinical Physiology
**University of Montpellier, France**

8PhyMedExp, INSERM U1046, CNRS UMR 9214

**Medical University Vienna, Vienna, Austria**

9Division Cardiac, Thoracic, Vascular Anesthesia and Intensive Care

**Sheffield Teaching Hospitals, Sheffield and University of Sheffield, United Kingdom**

10Operating Services, Critical Care and Anesthesia

**Massachusetts General Hospital, Boston, U.S.A.**

11Department of Anesthesia, Critical Care and Pain Medicine

12**Queen Mary University of London, London, UK**

**University Hospital Bonn, Bonn, Germany**

13Department of Anesthesiology and Intensive Care Medicine

**University of Insubria, Varese, Italy**

14Department of Biotechnology and Sciences of Life, ASST- Settelaghi Ospedale di Circolo e Fondazione Macchi

**University of Leipzig, Leipzig, Germany**

15Department of Anesthesiology and Intensive Care Medicine

16**Policlinico San Martino Hospital – IRCCS for Oncology and Neurosciences, Genoa,Italy**

**University of Genoa Italy**

17Department of Surgical Sciences and Integrated Diagnostics

**Technische Universität Dresden, Dresden, Germany**

18Department of Anesthesiology and Intensive Care Therapy, Pulmonary Engineering Group

**Mahidol University, Bangkok, Thailand**

19Mahidol–Oxford Tropical Medicine Research Unit (MORU)

**University of Oxford, Oxford, UK**

20Nuffield Department of Medicine

Table of Contents

**Statistics – Details on covariate balancing propensity score calculation, variable selection process and propensity score matched posthoc analysis. 3**

**Supplementary Tables4**

**Table S1 –** Definition of postoperative pulmonary complications 4

**Table S2 –** Definition of intraoperative adverse events 5

**Table S3 –** Patients demographics and surgery–related characteristics in the matched cohort for type of surgery6

**Table S4 –** Intraoperative and postoperative outcomes in matched cohort for type of surgery 8

**Table S5 –** Mixed multivariable logistic regression in matched cohort for postoperative pulmonary complications 9

**Supplementary Figures10**

**Figure S1 –** Details on driving pressure measures calculations10

**Figure S2 –** Summary plot of covariate balancing score adjustment for each driving pressure measure in open surgery11

**Figure S3 –** Summary plot of covariate balancing score adjustment for each driving pressure measure in closed surgery12

**Figure4** – Residuals plot for primary and secondary outcomes13

**References14**

**Statistics – Details on covariate balancing propensity score calculation, variable selection process and propensity score matched posthoc analysis.**

The association between the main dependent variable (time weighted driving pressure) was tested by fitting a weighted mixed effect logistic regression model with a weighting factor obtained by covariate balancing propensity score (CBPS) and a random intercept by center.

The variable selection process to enter the propensity score calculation was done using the augmented backwards elimination process implemented in the *abe* R package.1 The variables that finally entered the propensity score calculation for open surgery were: age, gender, body mass index, ASA risk score, functional status, smoker status, baseline comorbidities (chronic obstructive pulmonary disease, oncologic disease, heart failure, chronic kidney disease, obstructive sleep apnea disease, neurologic disease), duration of anesthesia, ARISCAT score (as individual variables) , type of surgery, urgency of surgery, time of surgery, previous and perioperative blood cell transfusion, use of epidural anesthesia, use of recruiting maneuvers, use of neuromuscular monitoring, use of neuromuscular blocking agents reversal, total fluid administration (body weight normalized), total cristalloid administration (body weight corrected), mode of mechanical ventilation, type of anesthetic agent (intravenous vs. halogenated), perioperative mechanical ventilation characteristics (median minute ventilation, median respiratory rate, median fraction of inspired oxygen, median end–tidal CO2 and median SpO2, median per–actual body weight VT, median static and dynamic compliance, highest PEEP, lowest PEEP and PEEP coefficient of variation, and driving pressure measures other than the main dependent variable analyzed). The variables that finally entered the propensity score calculation for closed surgery were the same with the addition of antibiotic prophylaxis.

For secondary endpoint (association between driving pressure and intraoperative adverse events) a weighted ordinal regression was fitted with *ordinal* R package. We chose this approach to better model the intraoperative adverse events variables as an ordinal variable where having two events in worse than one, three is worse than two etc.. Weighting factor was the propensity score as described in the previous model for PPCs.

The propensity score for posthoc matched analysis was calculated with the same covariable structure as the CBPS with the *matchit* package.2

| **Table S1. Definition of postoperative pulmonary complications** | |
| --- | --- |
| **Single PPC** | **Definition** |
| **Unplanned need for oxygen therapy** | Supplemental O2 therapy administered to correct hypoxemia, defined as SpO2 < 90% in room air or PaO2 < 60 mmHg. This excludes oxygen administration given as a part of standard care, such as routine oxygen administration at the arrival in the PACU. |
| **Respiratory failure** | SpO2 < 90% in room air or PaO2 < 60 mmHg with oxygen therapy, or need for non-invasive mechanical ventilation |
| **Mechanical ventilation** | Need for new invasive ventilation after surgery, or unexpected prolonged invasive ventilation after discharge from the operating room |
| **ARDS** | According to the Berlin definition |
| **Pneumonia** | Lung infiltrates at the chest X-ray or CT, plus at least two among the following three criteria: fever > 38°C (100.4 °F), leucocytosis or leukopenia (WBC count > 12000 or <4000 cells/mm3), purulent secretions |
| **Pneumothorax** | Air in the pleural space without blood presence, as confirmed by chest X-ray |

***Composite outcomes***

**Severe PPC:** at least one PPC among respiratory failure, mechanical ventilation, ARDS, pneumonia, pneumothorax, as defined in eTable1.

| **Table S2. Definition of intraoperative complications** | |
| --- | --- |
| **Intraoperative Complication** | **Definition** |
| **De-saturation** | SpO2 < 92% |
| **Need for rescue recruitment manoeuvre** | Ventilation strategies aimed at restoring aeration of the lungs |
| **Need for ventilatory pressure reduction** | Ventilation strategies aimed at lowering peak and/or plateau pressure |
| **New onset of expiratory flow limitation** | End-expiration expiratory flow higher than zero at the visual analysis of the flow curve |
| **Hypotension** | Systolic arterial pressure < 90 mmHg for at least 3 minutes |
| **Need for vasoactive drugs** | Use of vasoactive drugs to correct hypotension as previously defined |
| **Arrhythmia** | Defined as any new onset of atrial fibrillation, sustained ventricular tachycardia, supraventricular tachycardia, or ventricular fibrillation |

| **Table S3. Patients demographics and surgery–related characteristics in the matched cohort for type of surgery.** | | | |
| --- | --- | --- | --- |
|  | **Laparoscopic abdominal surgery**  **(N = 254)** | **Non–laparoscopic abdominal surgery**  **(N = 344)** | **SMD** |
| **Age, years** | 54 (18) | 55 (16) | 0.070 |
| **Gender, male (%)** | 37% (94/254) | 41% (143/344) | 0.094 |
| **BMI (Kg∙m-2)** | 25.9 [23.4–30.1] | 26.6 [23.3–29.7] | 0.015 |
| **ASA class, % (n/N)** |  |  | 0.256 |
| 1  2  3  4  5 | 22% (55/254)  56% (143/254)  22% (56/254)  0% (0/254)  0% (0?254) | 20% (70/344)  53% (180/344)  24% (84/344)  3% (9/344)  0% (1/344) |  |
| **ARISCAT class, % (n/N)** |  |  | 0.099 |
| < 26  26–44  > 44 | 55% (141/254)  36% (91/254)  9% (22/254) | 51% (174/344)  40% (137/344)  9% (33/344) |  |
| **Current smoker, %** | 81% (205/254) | 78% (269/344) | 0.062 |
| **Chronic comorbidity, % (n/N)** |  |  |  |
| Metastatic cancer  Chronic kidney failure  COPD  Heart failure  OSAS  Neuromuscular diseasea | 2% (22/906)  1% (13/906)  7.% (83/906)  6% (53/906)  3% (27/906)  1% (6/906) | 10% (116/1.128)  6% (68/1.128)  6% (55/1.128)  8% (90/1.128)  1% (15/1.128)  1% (11/1.128) | 0.141  0.042  0.012  0.050  0.022  0.060 |
| **Functional Status, % (n/N)** |  |  | 0.066 |
| Independent  Partially dependent  Totally dependent | 94% (239/254)  5% (13/254)  1% (2/254) | 93% (323/344)  5% (16/344)  2% (5/344) |  |
| **Preop transfusion, % (n/N)** | 1% (3/254) | 1% (3/344) | 0.031 |
| **Surgical procedure**b, **% (n/N)** |  |  |  |
| Lower GI  Upper GI, HBP  Urological  Gynecological  Endocrine surgery  Neurosurgery  Other procedure | 76% (194/254)  28% (72/254)  11% (29/254)  31% (81/254)  0% (0/254)  1% (1/254)  4% (12/254) | 72% (264/344)  27% (95/344)  11% (39/344)  28% (97/344)  0% (1/344)  1% (2/344)  4% (15/344) | 0.111  0.016  0.003  0.081  0.076  0.024  0.017 |
| **Urgency of Surgery**c, **% (n/N)** |  |  | 0.017 |
| Elective  Urgent  Emergency | 83% (212/254)  11% (27/254)  6% (15/254) | 83% (288/344)  11% (37/344)  6% (19/344) |  |
| **Duration of anesthesiae , min** | 109 [78–171] | 120 [85–180] | 0.111 |
| **Time of surgery**, **% (n/N)** |  |  | 0.001 |
| Daytimef  Night–time | 95% (242/254)  5% (12/254) | 95%(328/344)  5% (16/344) |  |
| **Antibiotic prophylaxis, % (n/N)** | 82% (662/254) | 85% (292/344) | 0.091 |
| **Intraop. procedures, % (n/N)** |  |  |  |
| Epidural anesthesia | 7% (18/254) | 8% (28/344) | 0.040 |
| Neuromuscular Monitoring | 19% (49/254) | 20% (71/344) | 0.034 |
| Neuromuscular Reversal | 49% (124/254) | 49% (171/344) | 0.018 |
| TIVA | 9% (24/254) | 9% (31/344) | 0.015 |
| Transfusion | 4% (10/254) | 5% (19/344) | 0.075 |
| Total Fluids (mL∙ kg-1) | 22 (15) | 23 (14) | 0.094 |
| Crystalloids (mL∙ kg-1) | 20 (14) | 21 (14) | 0.076 |
| **Ventilation mode, % (n/N)** |  |  | 0.002 |
| Volume–controlled | 82% (208/254) | 82% (282/344) |  |
| Pressure–controlled | 18% (46/254) | 18% (62/254) |  |
| **Tidal Volume** |  |  |  |
| Per ABW (ml∙kg-1) | 7 (1) | 7 (1) | 0.027 |
| **Minute ventilation (L∙kg-1)** | 6.4 (1.1) | 6.4 (1.5) | 0.023 |
| **Respiratory system compliance** |  |  |  |
| Dynamic, ml∙cm∙H2O-1 | 27 (9) | 27 (9) | 0.072 |
| Static, ml∙cm∙H2O-1 | 43 (13) | 44 (12) | 0.041 |
| **Routine recruitment maneuvers, % (n/N)** | 7% (17/254) | 7% (25/344) | 0.023 |
| **FiO2, %** | 55 (13) | 55 (13) | 0.008 |
| **SpO2, %** | 99 (1) | 99 (1) | 0.003 |
| **EtCO2, kPa** | 4.5 (0.6) | 4.4 (0.6) | 0.106 |
| **Airway pressures** |  |  |  |
| **Driving pressure (cm∙H2O)** |  |  |  |
| Time–weighted average | 8.42 (3.55) | 8.46 (3.24) | 0.009 |
| Maximum value | 15.03 (5.03) | 14.75 (4.79) | 0.058 |
| Minimum value | 11.81 (4.20) | 11.80 (4.32) | 0.002 |
| Coefficient of variation (%) | 13.21 (12.83) | 12.47 (11.64) | 0.061 |
| **PEEP (cm∙H2O)** |  |  |  |
| Maximum value | 3.72 (2.45) | 3.72 (2.61) | 0.001 |
| Minimum value | 2.87 (2.29) | 2.87 (2.34) | 0.001 |
| Data are presented as meas (SD) or median [25th–75th percentile] or % (n/N).  Abbreviations: BMI, body mass index; ASA, American Society of Anesthesiologists; ; GI: gastrointestinal; HBP, Hepatobiliopancreatic; SpO2, peripheral oxygen saturation: CI, confidence interval; SMD, Standardized mean differences.  aNeuromuscular disease affecting the respiratory system.  bTha same patient may have more than one surgical indication  cUrgency of surgery is defined as *elective*: surgery that is scheduled in advance because it does not involve a medical emergency, *urgent*: surgery required within <48 hours*, emergent*: surgery performed when the patients' life or well being are threatened.  dDuration of surgery is the time between skin incision and closure of the incision.  eDuration of anaesthesia is the time between start of induction and tracheal extubation or discharge from operation room if the mechanical ventilation is continued.  fDaytime surgery is defined as anaesthesia induction between 8:00 a.m. and 19:59 p.m. | | | |

| Table S4. Intraoperative and postoperative outcomes in matched cohort for type of surgery. | | | |
| --- | --- | --- | --- |
|  | **Closed surgery**  **(N = 254)** | **Open surgery**  **(N = 341)** | ***P–* value** |
| Severe PPC (composite), % (n/N) | 4% (10/254) | 7% (22/341) | 0.246 |
| Intraoperative complications |  |  |  |
| Desaturation | 1% (3/254) | 4% (16/341) | 0.030 |
| Unplanned rescue maneuvers | 3% (8/254) | 4% (16/341) | 0.986 |
| Airway pressure reduction needed | 7% (18/254) | 1% (4/341) | < 0.001 |
| Expiratory flow limitation | 0.3% (4/254) | 1% (1/341) | 0.215 |
| Hypotension | 20% (53/254) | 25% (380/341) | 0.192 |
| Use of vasopressors | 17% (43/254) | 20% (68/341) | 0.408 |
| New arrhythmia onset | 0% (0/254) | 1% (3/341) | 0.361 |
| Individual PPCs |  |  |  |
| Unplanned need for supplementary O2 | 13% (33/254) | 15% (52/341) | 0.509 |
| Acute respiratory failure | 3% (9/254) | 3% (12/341) | 1.000 |
| Need for mechanical ventilation | 3% (8/254) | 3% (11/341) | 1.000 |
| Acute respiratory distress syndrome | 0% (0/254) | 0.6% (2/341) | 0.612 |
| Pneumonia | 0% (0/254) | 1% (5/341) | 0.138 |
| Pneumothorax | 0% (0/254) | 0.3% 1/341) | 1.000 |
| Data are presented as median [25th–75th percentile] or % (n/N). PPC, postoperative pulmonary complications. | | | |

| **Table S5. Mixed multivariable logistic regression in matched cohort for postoperative pulmonary complications** | | |
| --- | --- | --- |
| Variables | **OR** [**L– U 95%CI]** | ***P*** |
| **Laparoscopic surgery Yes** | **0.69 [0.39 to 1.21]** | **0.238** |
| **Time–weighted driving pressure** | 0.44 [0.19 to–0.97] | 0.043 |
| **Maximum driving pressure** | 5.714 [1.57 to 20.740] | 0.008 |
| **Driving pressure coefficient of variation** | 0.66 [0.344 to 1.27] | 0.210 |
| **Minimum driving pressure** | 0.46 [0.168 to 1.26] | 0.130 |
| **Maximum PEEP** | 1.03 [0.66 to 1.60] | 0.890 |
| **Minimum PEEP** | 1.47 [0.95 to 2.28] | 0.081 |
| **Age** | 1.33 [0.95 to 1.87] | 0.100 |
| **Gender** | 0.86 [0.48 to 1.56] | 0.621 |
| **Asa (Reference: ASA 1)** |  |  |
| Asa 2 | 1.37 [0.531 to 3.530] | 0..516 |
| Asa 3 | 2.09 [0.71 to 6.07] | 0.178 |
| Asa ≥ 4 | 4.721 [0.63 to 34.946] | 0.129 |
| **Chronic Bronchitis (Yes)** | 3.40 [1.28 to 8.980] | 0.014 |
| **Cancer (Yes)** | 2.33 [1.04 to 5.25] | 0.040 |
| **Duration of anesthesia** | 1.96 [1.30 to 2.97] | 0.001 |
| **ARISCAT score (Reference: Low < 26 )** |  |  |
| ARISCAT Intermediate (26 – 44) | 0.85 [0.44 to 1.63] | 0.621 |
| ARISCAT high (>45) | 1.26 [0.48 to 3.30] | 0.640 |
| **Urgency of Surgery (Reference: Elective)** |  |  |
| Urgent | 0.55 [0.18 to 1.68] | 0.291 |
| Emergency | 3.47 [0.99 to 12.070] | 0.051 |
| **Epidural anesthesia** | 1.13 [0.43 to 2.97] | 0.797 |
| **NMB monitoring Yes** | 1.52 [0.73 to 3.15] | 0.260 |
| **TV Per body weight** | 0.80 [0.59 to 1.10] | 0.169 |
| **Static Compliance** | 0.94 [0.56 to 1.58] | 0.816 |
| Sd centers. (Intercept) | 0.97 | |
| Abbreviations: OR, Odds Ratio; L, Lower 95% Confidence Interval Boundary; U 95% Confidence Interval Boundary | | |

**eFigure 1.** Time weighted average and coefficient of variation calculation

**eFigure 2.** Summary plot of covariate balance for time‑weighted ΔP before (red line) and after (blue line) conditioning for open surgery.

**eFigure 3.** Summary plot of covariate balance before (red line) and after (blue line) conditioning for closed surgery. **A**: time–weighted; **B**: Highest value; **C:** Lowest Value; **D**: Coefficient of variation.

**eFigure 4.** Residuals plot for postoperative pulmonary complications (PPCs) and intraoperative adverse events (AEs). A: PPCs in Open surgery; B: PPCs in closed surgery; C; AEs in open surgery; D: AEs in closed surgery.

**REFERENCES**

1. Dunkler D, Plischke M, Leffondré K, Heinze G. Augmented backward elimination: A pragmatic and purposeful way to develop statistical models. *PLoS One*. 2014; **9**:1–19.
2. Ho D, Imai K, King G, Sturat EA. MatchIt: Nonparametric Preprocessing for Parametric Causal Inference. *J Stat Softw*. 2011. **42**:pii: 8.
